# Supplementary material for: Unexpected response of nitrogen deposition to nitrogen oxide controls and implications for land carbon sink
Source: PubMed Central journal article supplement (PMC9170707; doi:10.1038/s41467-022-30854-y), 2022-06-06
Supplement: 41467_2022_30854_MOESM1_ESM.pdf [file 41467_2022_30854_MOESM1_ESM.pdf]

## **Supplementary Information for**

### **Unexpected responses of nitrogen deposition to nitrogen oxide controls and implications for land carbon sink**

Mingxu Liu, Fang Shang, Xingjie Lu, Xin Huang, Bing Liu, Yu Song, Qiang Zhang, Xuejun Liu, Junji Cao, Tingting Xu, Tiantian Wang, Zhenying Xu, Wen Xu, Wenling Liao, Ling Kang, Xuhui Cai, Hongsheng Zhang, Yongjiu Dai, and Tong Zhu

Correspondence to: Yu Song and Tong Zhu

Email: [songyu@pku.edu.cn](mailto:songyu@pku.edu.cn) (Y.S.) and [tzhu@pku.edu.cn](mailto:tzhu@pku.edu.cn) (T.Z.)

#### **This PDF file includes:**

Supplementary Text 1  
Figures S1 to S12  
Table S1 to S4  
Supplementary References

## Supplementary Text 1

### Model evaluation

The Weather Research and Forecast model coupled to Chemistry (WRF-Chem) was used to simulate the atmospheric cycle of reactive nitrogen compounds, including their emissions, atmospheric transport, and dry/wet deposition to the Earth's surface. To evaluate the model fidelity, especially in the simulations of oxidized nitrogen ( $\text{NO}_y\text{-N}$ ) deposition, we employed the nationwide observation networks for the nitrogen deposition fluxes (Supplementary Fig. 1) and airborne particulate nitrate concentrations (Supplementary Fig. 2).

For nitrogen deposition in China's terrestrial land, our model results were broadly in line with previous studies<sup>1,2,3</sup> with regard to the spatial distributions of deposition fluxes and the relative contributions of deposition forms. For example, in our simulation the annual sum of  $\text{NO}_y\text{-N}$  deposition over the Chinese terrestrial land was estimated to be 5.2 Tg N  $\text{yr}^{-1}$  in 2015, accounting for 47% of the total N deposition, with the remaining part from reduced nitrogen ( $\text{NH}_x\text{-N}$ ; 5.8 Tg N  $\text{yr}^{-1}$ ); and the dry and wet forms have almost equally contributions. As a comparison, Xu et al.<sup>2</sup> presented nation-scale in-situ measurements across 43 monitoring sites in China for the years 2010–2014; and they showed that  $\text{NO}_y\text{-N}$  contributes to 42% of the deposition averaged over all sites and the dry deposition shares 52% of the averaged deposition fluxes. The multiple-model ensemble results in MICS-Asia III<sup>1</sup> also showed that  $\text{NO}_y\text{-N}$  contributes to 48% of the total deposition over China and the dry forms contribute to 49%.

We compared the observed nitrogen deposition fluxes ( $\text{kg N ha}^{-1} \text{yr}^{-1}$ ) in a nationwide monitoring network with the corresponding simulations. It is revealed that high  $\text{NO}_y\text{-N}$  fluxes of more than 10  $\text{kg N ha}^{-1} \text{yr}^{-1}$  are concentrated in the Eastern China, the Southern China, and the Southwestern China, with the hotspots reaching 20  $\text{kg N ha}^{-1} \text{yr}^{-1}$  (marked in Supplementary Fig. 1a). There were 54% of the model results having the discrepancies with the observations within a factor of two (FAC2). Similarly, the Model Inter-Comparison project, MICS-Asia III<sup>1</sup>, has shown the model-ensemble  $\text{NO}_y\text{-N}$  fluxes between 10–20  $\text{kg N ha}^{-1} \text{yr}^{-1}$  in eastern China. The FAC2 of  $\text{NO}_y\text{-N}$  values for different participating models ranged from 36.1% to 60.2%. Though that the model-observation

comparison may be subject to some uncertainties in this study, in part because the model with a coarse horizontal grid resolution (50 km × 50 km) was not able to perfectly capture the influences of local sources and complex terrain on in-situ observations, our model achieved reasonable and state-of-the-art performance in characterizing the nitrogen deposition over China.

For the simulations of particulate nitrate formation, our recent studies have demonstrated that the model used in this study can well represent the chemical formation of nitrate acids and their thermodynamic partitioning between the gas and aerosol phases<sup>4,5</sup>. Similar to previous reports, we provided the detailed comparison of modeled nitrate concentrations with the airborne measurements at in-situ stations across China (Supplementary Fig. 2). The high nitrate concentrations in Eastern China in both our simulations and observations reflect the intensive anthropogenic nitrogen oxide (NO<sub>x</sub>) emissions and the efficient transformation of NO<sub>x</sub> to nitrate acids via both daytime and nighttime oxidation regimes. The observed seasonal contrast of nitrate pollutions between summer and winter periods was captured by our model (Supplementary Fig. 2b and c), which represented the enhanced formation of nitrate aerosols in winter due to favorable environmental conditions (e.g., low temperature and high humidity).

The daily observations of nitrate concentrations were compared to the model results (Supplementary Fig. 2d and e). We also calculated several statistical indexes to indicate the model performance of nitrate pollutions. The normalized mean biases were 27% for the summer period and -29% for the winter period. More than 60% of the comparisons show the differences within a factor of two. Our results were actually much better than other recent nitrate simulations in China<sup>6</sup>. To sum up, we gave a thorough model evaluation using those in-situ measurements of atmospheric reactive nitrogen compounds and their deposition fluxes to the land. The evaluation results provide a high confidence in the further analysis of the response of nitrogen deposition to NO<sub>x</sub> emission controls.

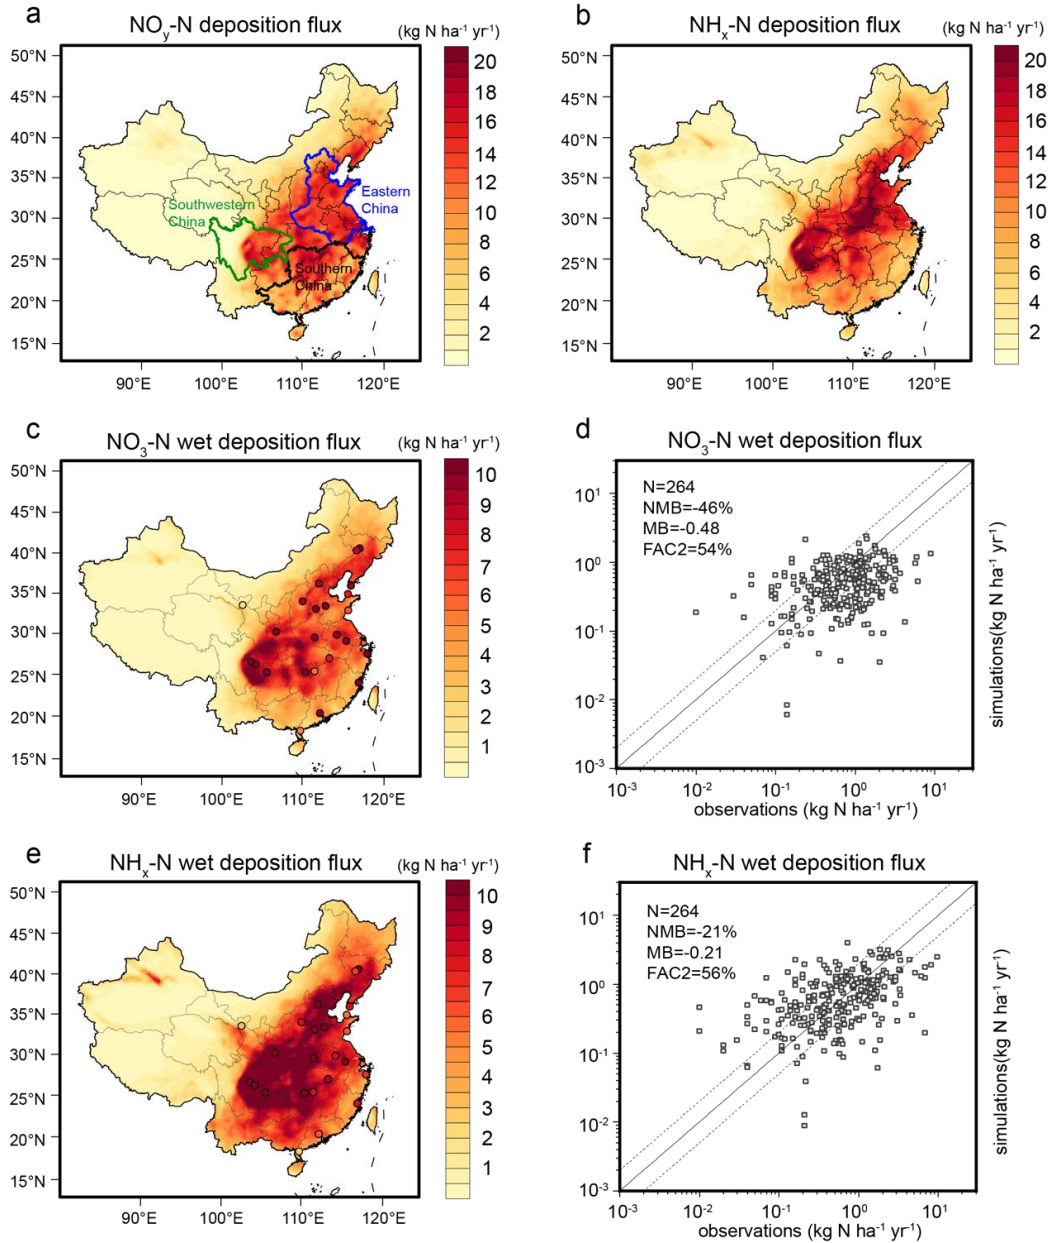

**Supplementary Fig. 1 Evaluation of simulated nitrogen deposition flux against the observations of 2015 in China mainland.** **a** Simulated spatial distribution of annual accumulated  $\text{NO}_y\text{-N}$  deposition flux in China in the Baseline case. Eastern China (marked in blue line) includes Beijing, Tianjin, Hebei, Shandong, Henan, Shanghai, Jiangsu and Anhui provinces. Southern China (marked in black thick line) includes Hunan, Jiangxi, Fujian, Guangdong and Guangxi provinces. Southwestern China (marked in green line) includes Chongqing and Sichuan provinces. **b** Spatial distribution of  $\text{NH}_x\text{-N}$  deposition flux. **c, d** Comparison of  $\text{NO}_3\text{-N}$  wet deposition fluxes with the observations at 24 sites. **e, f** Comparison of  $\text{NH}_x\text{-N}$  wet deposition with the observations. Filled circles are annually accumulated observations. The observations were derived from Xu et al.<sup>7</sup> databases. Three statistics indexes, normalized mean bias (NMB), mean bias (MB) and percentage of model results within a factor of two with observations (FAC2) are shown for reference. The solid 1:1 line and two dashed 1:2 and 2:1 lines are shown in the panel e and f. The map of China was reproduced from the National Geographic Information Resource Directory Service (<https://github.com/huangynj/NCL-Chinamap.git> and <https://www.webmap.cn/commres.do?method=result100W>).

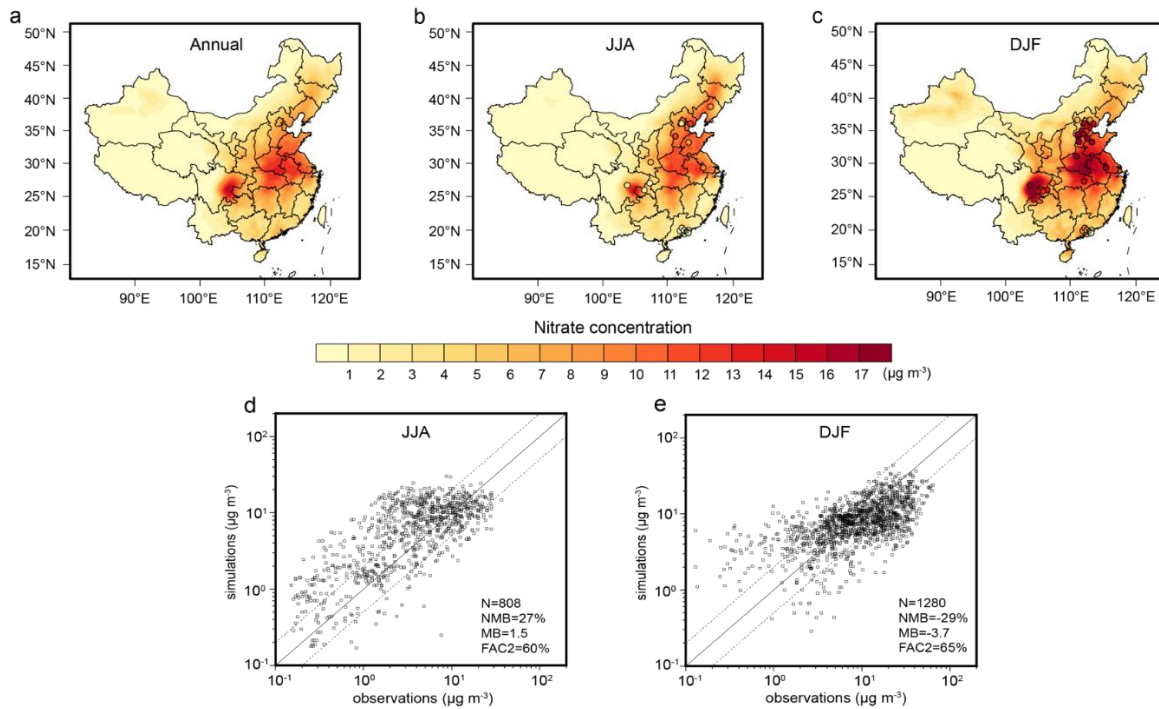

**Supplementary Fig. 2 Evaluation of simulated aerosol nitrate concentration against the observations during JJA and DJF of 2015.** **a** Spatial distribution of simulated annual mean nitrate concentration in China. **b** Spatial distribution of simulated mean nitrate concentration during JJA (June, July, and August). Filled circles are seasonally mean observations. **c** Spatial distribution of nitrate concentrations for DJF (December, January, and February). **d** Evaluation of simulated nitrate against the daily observations at 28 sites during JJA. The locations of sites are shown by the filled circles in the panel **b**. **e** Evaluation of simulated nitrate against the daily observation at 35 sites during DJF. The site locations are shown by the filled circles in the panel **c**. Description of the sites information can be seen in Liu et al.<sup>5</sup>. Three statistics index, normalized mean bias (NMB), mean bias (MB) and percentage of model results within a factor of two with observations (FAC2) are shown here for reference. The solid 1:1 line and two dashed 1:2 and 2:1 lines are shown. The map of China was reproduced from the National Geographic Information Resource Directory Service System (<https://github.com/huangynj/NCL-Chinamap.git> and <https://www.webmap.cn/commres.do?method=result100W>).

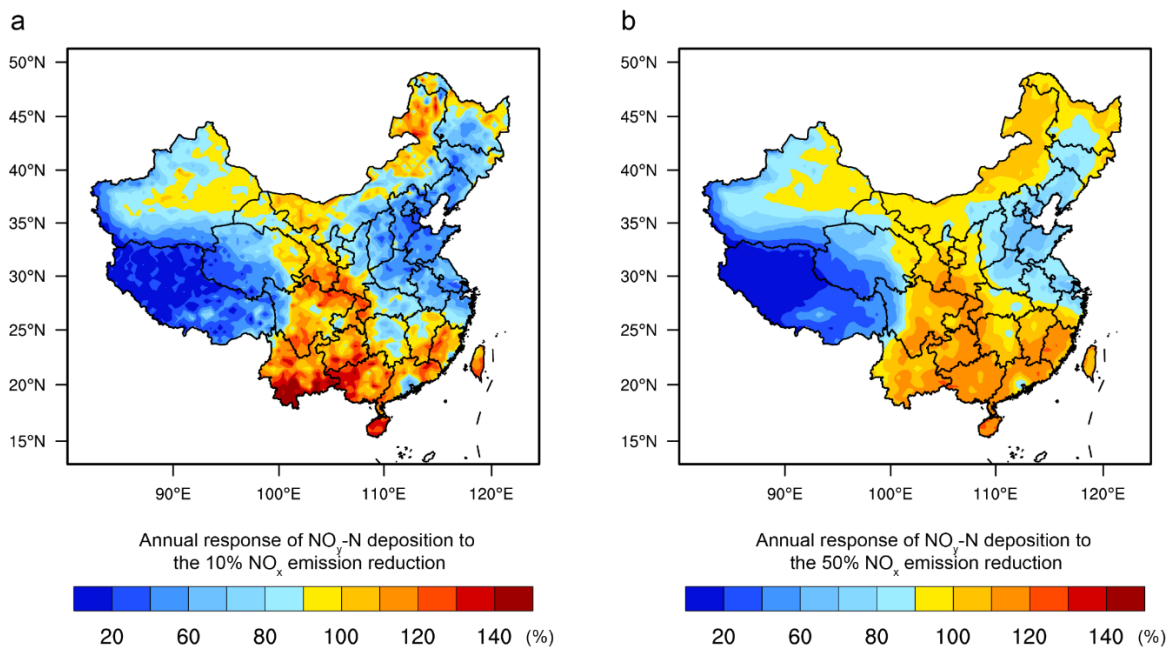

**Supplementary Fig. 3 Response of  $\text{NO}_y\text{-N}$  deposition to 10% and 50% reductions of  $\text{NO}_x$  emissions.** **a** Spatial distribution of the response of  $\text{NO}_y\text{-N}$  deposition to the 10%  $\text{NO}_x$  emission reduction. **b** The response of  $\text{NO}_y\text{-N}$  deposition to the 50%  $\text{NO}_x$  emission reduction. In this study, the response is defined as the ratio of changes in N deposition (total,  $\text{NO}_y\text{-N}$  dry, or  $\text{NO}_y\text{-N}$  wet) to changes in  $\text{NO}_x$  emissions. The map of China was reproduced from the National Geographic Information Resource Directory Service System (<https://github.com/huangynj/NCL-Chinamap.git> and <https://www.webmap.cn/commres.do?method=result100W>).

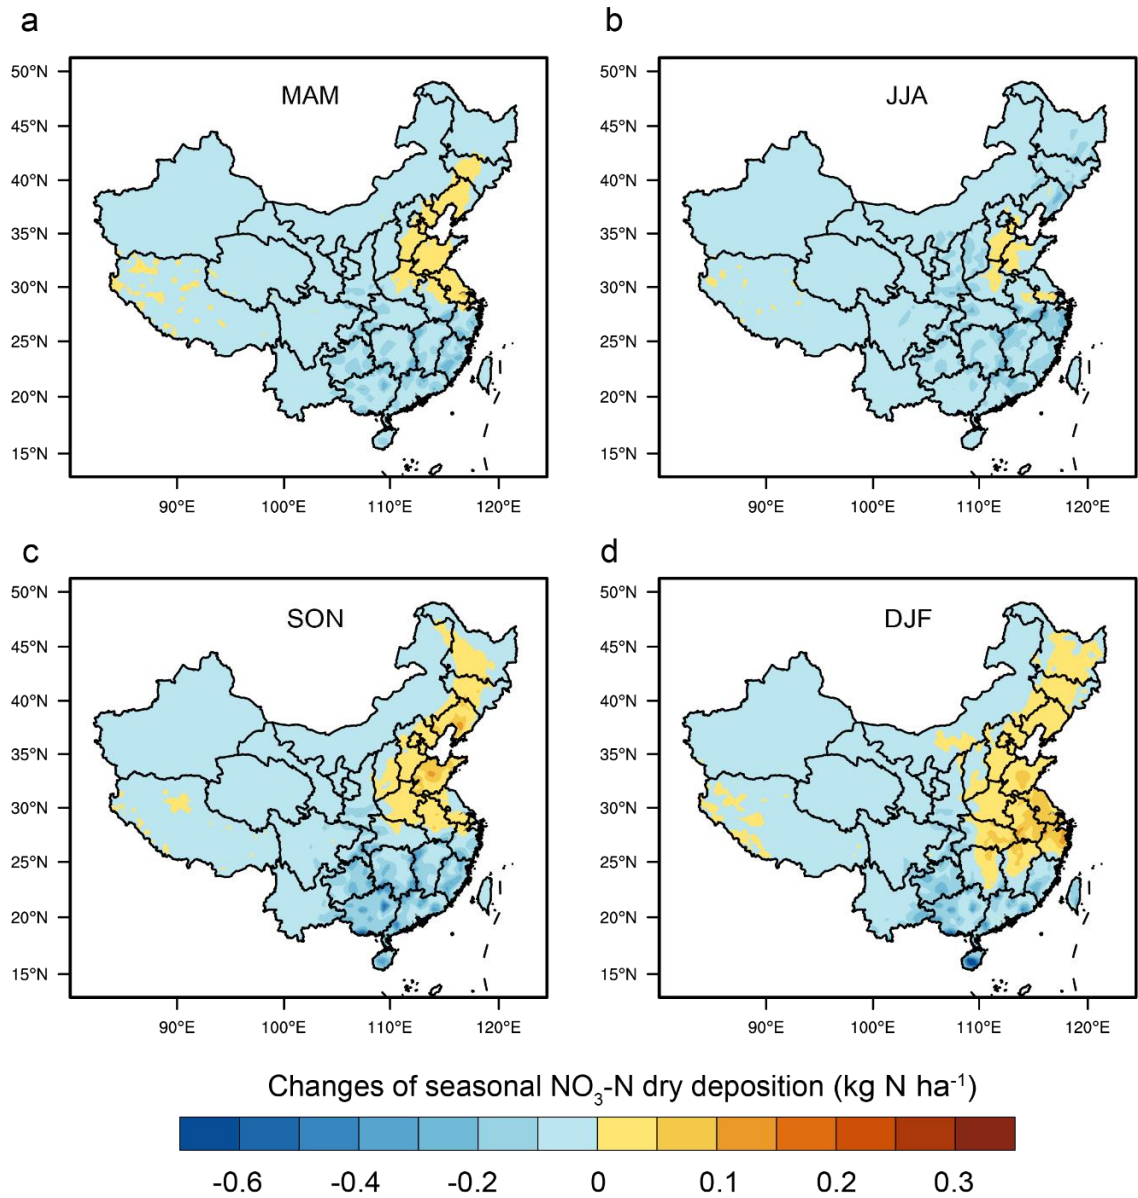

**Supplementary Fig. 4** Map of changes ( $\text{kg N ha}^{-1} \text{ yr}^{-1}$ ) in seasonal  $\text{NO}_3\text{-N}$  dry deposition in response to a nationwide 10% reduction of  $\text{NO}_x$  emissions relative to the Baseline case. Four different seasonal periods are shown, i.e., **a** MAM (March, April, and May), **b** JJA (June, July, and August), **c** SON (September, October, and November), and **d** DJF (December, January, and February). Positive values denote enhancement of deposition fluxes. The map of China was reproduced from the National Geographic Information Resource Directory Service System (<https://github.com/huangynj/NCL-Chinamap.git> and <https://www.webmap.cn/commres.do?method=result100W>).

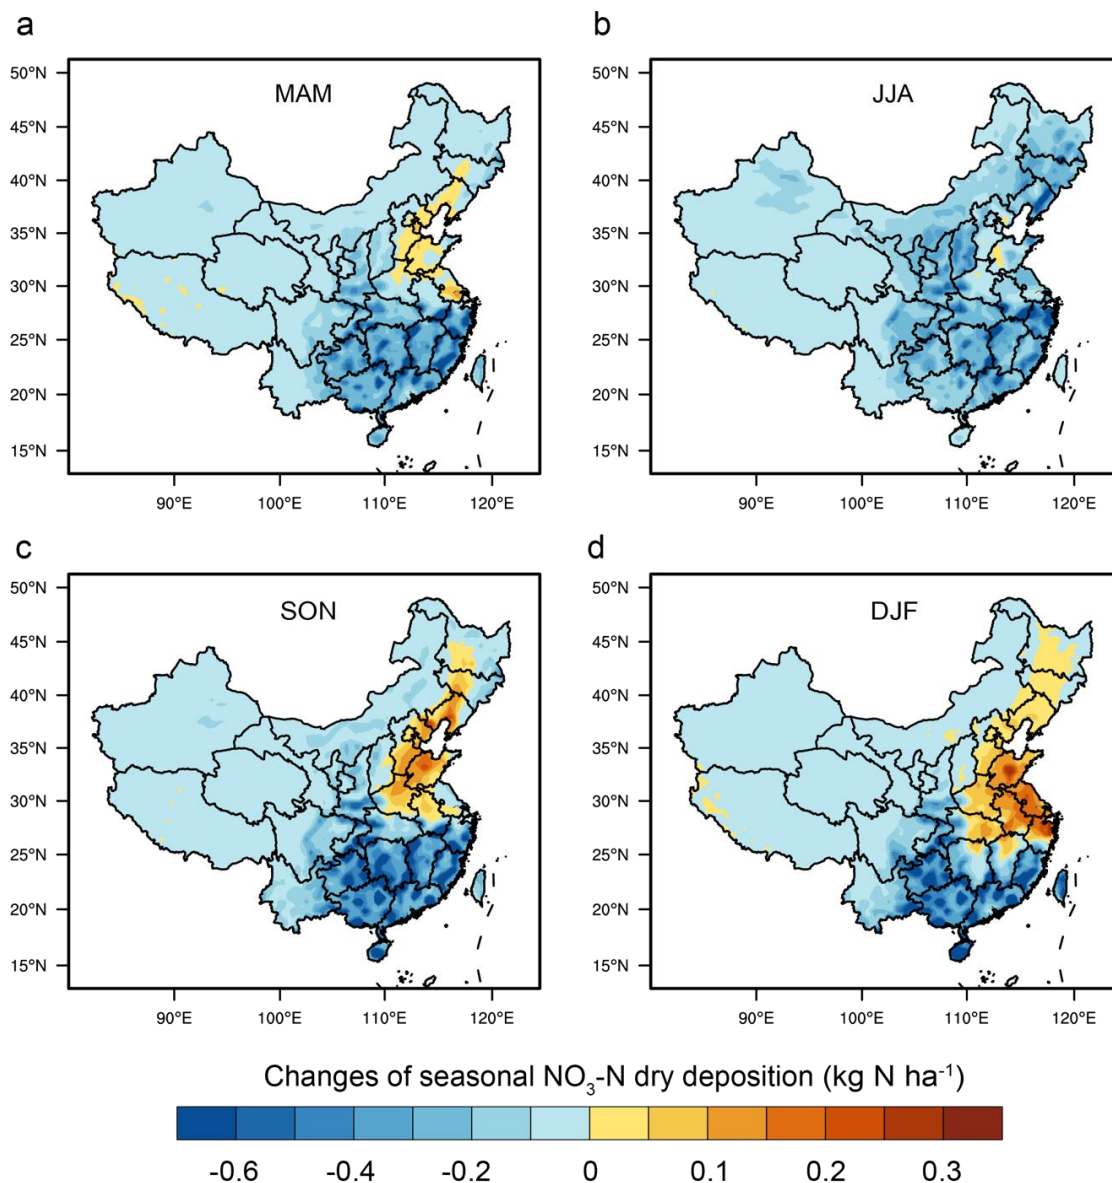

**Supplementary Fig. 5** Map of the changes ( $\text{kg N ha}^{-1} \text{ yr}^{-1}$ ) in seasonal  $\text{NO}_3\text{-N}$  dry deposition in response to a nationwide 30% reduction of  $\text{NO}_x$  emissions relative to the Baseline case. Four different seasonal periods are shown, i.e., a MAM (March, April, and May), b JJA (June, July, and August), c SON (September, October, and November), and d DJF (December, January, and February). Positive values denote enhancement of deposition fluxes. The map of China was reproduced from the National Geographic Information Resource Directory Service System (<https://github.com/huangynj/NCL-Chinamap.git> and <https://www.webmap.cn/commres.do?method=result100W>).



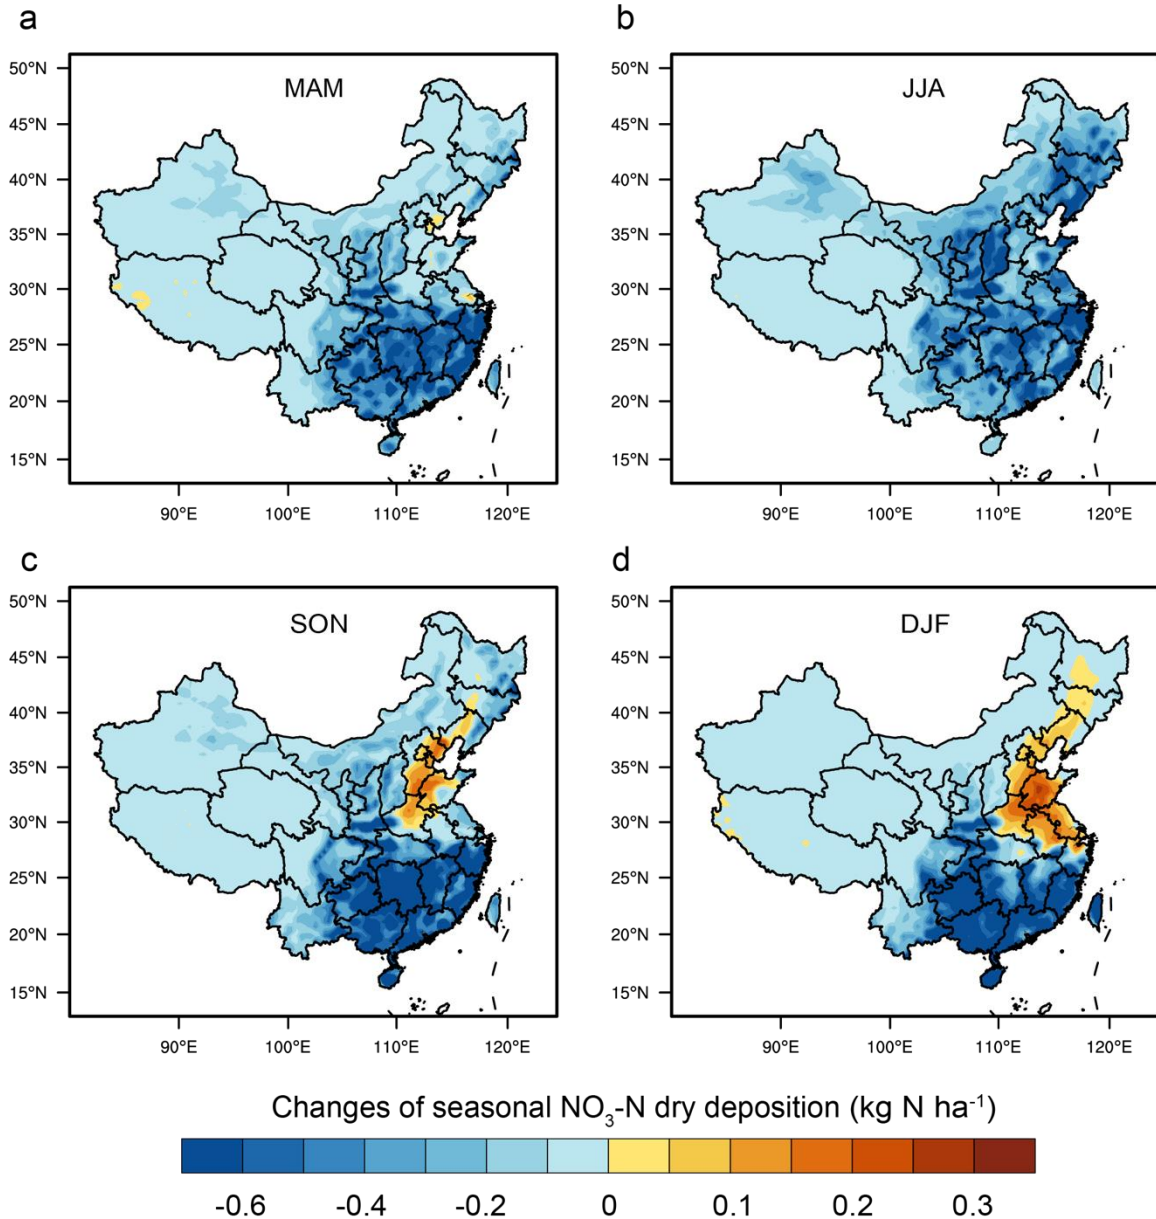

**Supplementary Fig. 6** Map of changes ( $\text{kg N ha}^{-1} \text{ yr}^{-1}$ ) in seasonal  $\text{NO}_3\text{-N}$  dry deposition in response to a nationwide 50% reduction of  $\text{NO}_x$  emissions relative to the Baseline case. Four different seasonal periods are shown, i.e., **a** MAM (March, April, and May), **b** JJA (June, July, and August), **c** SON (September, October, and November), and **d** DJF (December, January, and February). Positive values denote enhancement of deposition fluxes. The map of China was reproduced from the National Geographic Information Resource Directory Service System (<https://github.com/huangynj/NCL-Chinamap.git> and <https://www.webmap.cn/commres.do?method=result100W>).

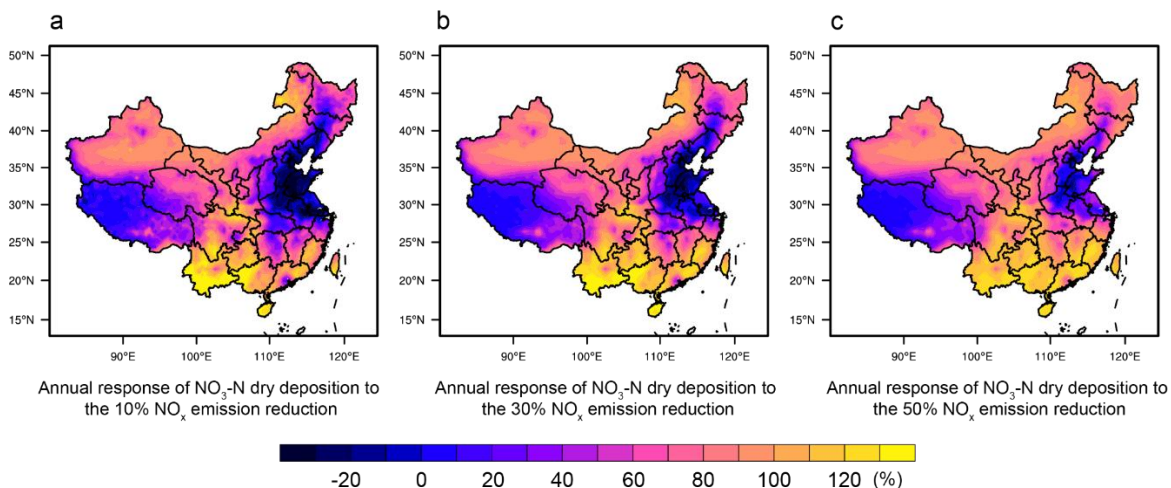

**Supplementary Fig. 7 Response of  $\text{NO}_3\text{-N}$  dry deposition to 10%, 30% and 50% reductions of  $\text{NO}_x$  emissions in China's land.** **a** Spatial distribution of the response of  $\text{NO}_3\text{-N}$  dry deposition to the 10%  $\text{NO}_x$  emission reduction. **b** The response of  $\text{NO}_3\text{-N}$  dry deposition to the 30%  $\text{NO}_x$  emission reduction. **c** The response of  $\text{NO}_3\text{-N}$  dry deposition to the 50%  $\text{NO}_x$  emission reduction. The map of China was reproduced from the National Geographic Information Resource Directory Service System (<https://github.com/huangynj/NCL-Chinamap.git> and <https://www.webmap.cn/commres.do?method=result100W>).

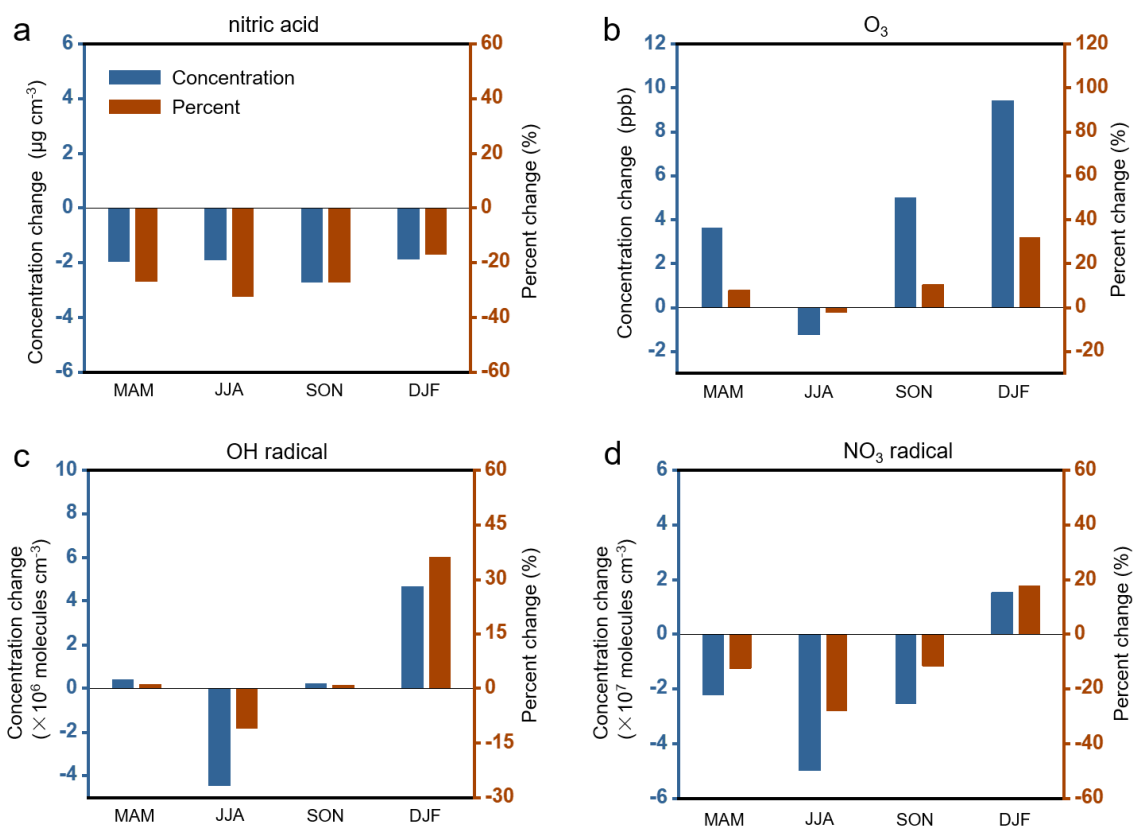

**Supplementary Fig. 8** Seasonal averaged changes in near-surface nitric acid, O<sub>3</sub>, NO<sub>3</sub> radical and OH radical concentrations in Southern China under a 30% NO<sub>x</sub> emission reduction. Both absolute and relative changes were calculated for **a.** nitric acid, **b.** O<sub>3</sub>, **c.** NO<sub>3</sub> radical, and **d.** OH radical. Four different seasonal periods are shown, i.e., MAM (March, April, and May), JJA (June, July, and August), SON (September, October, and November), and DJF (December, January, and February).

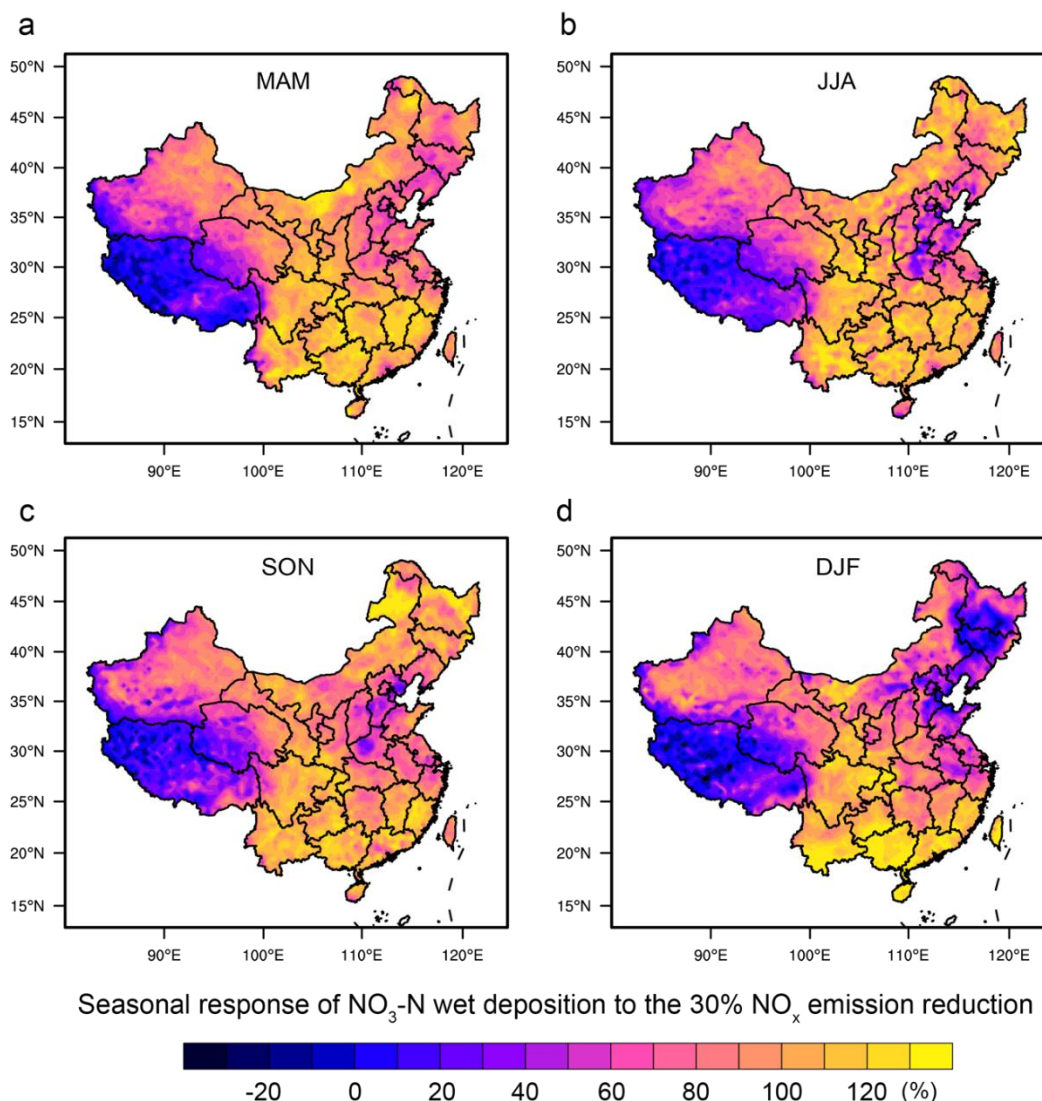

Seasonal response of  $\text{NO}_3\text{-N}$  wet deposition to the 30%  $\text{NO}_x$  emission reduction

**Supplementary Fig. 9 Seasonal responses of  $\text{NO}_3\text{-N}$  wet deposition to a 30% reduction of  $\text{NO}_x$  emissions.** Four different seasonal periods are shown, i.e., **a** MAM (March, April, and May), **b** JJA (June, July, and August), **c** SON (September, October, and November), and **d** DJF (December, January, and February). The map of China was reproduced from the National Geographic Information Resource Directory Service System (<https://github.com/huangynj/NCL-Chinamap.git> and <https://www.webmap.cn/commres.do?method=result100W>).

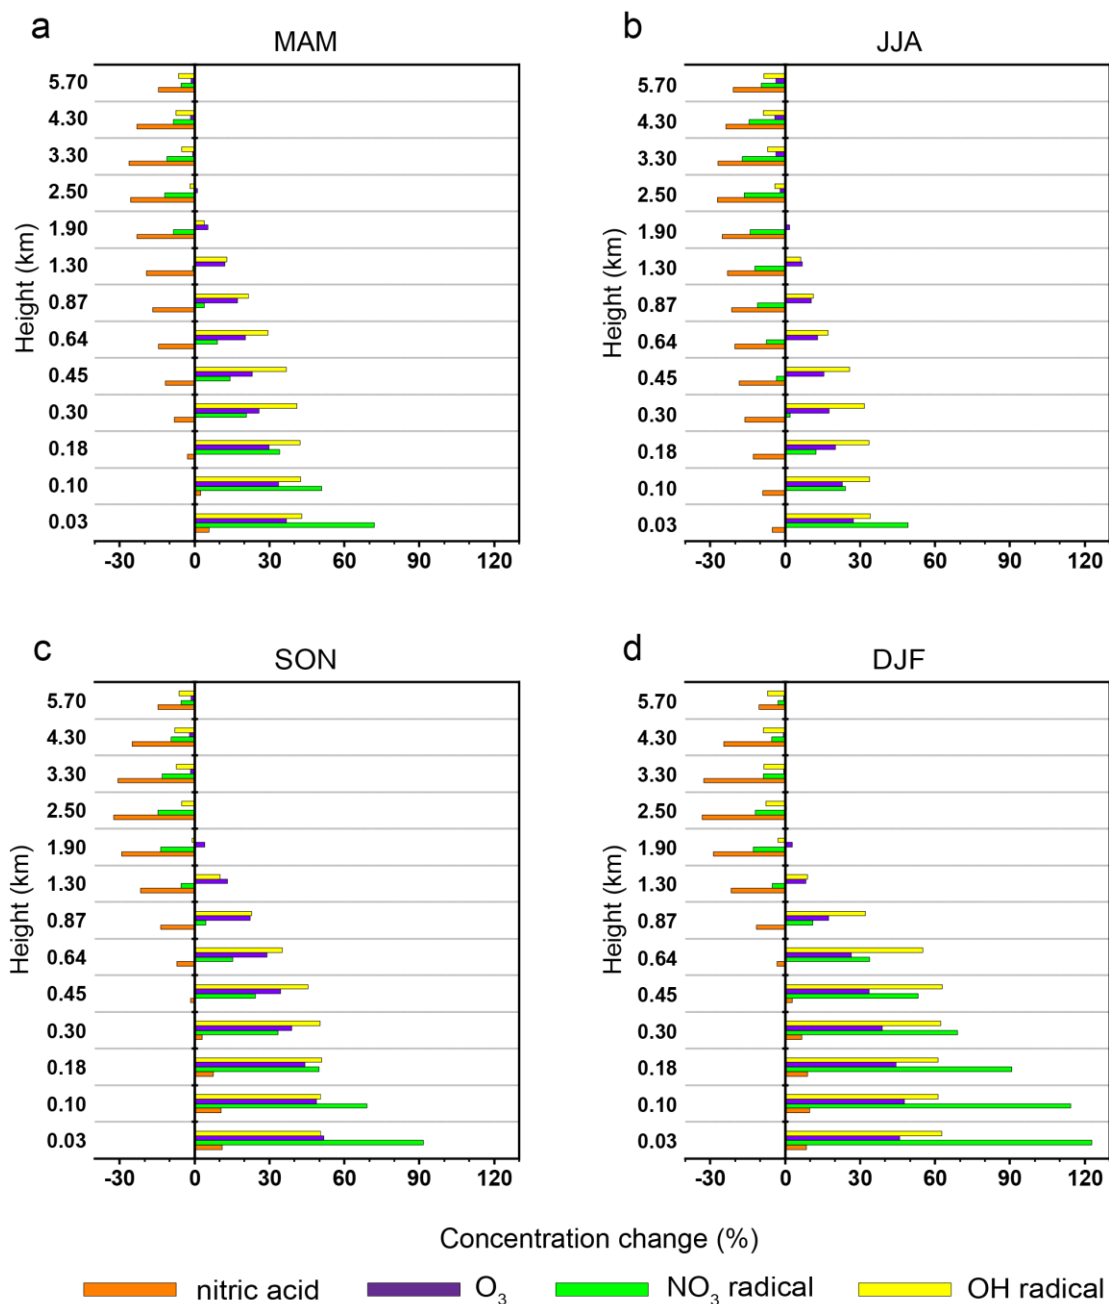

**Supplementary Fig. 10** Seasonal averaged changes (%) in vertical gradient nitric acid, O<sub>3</sub>, NO<sub>3</sub> radical and OH radical under a 30% NO<sub>x</sub> emission reduction over Eastern China. Four different seasonal periods are shown, i.e., **a** MAM (March, April, and May), **b** JJA (June, July, and August), **c** SON (September, October, and November), and **d** DJF (December, January, and February).

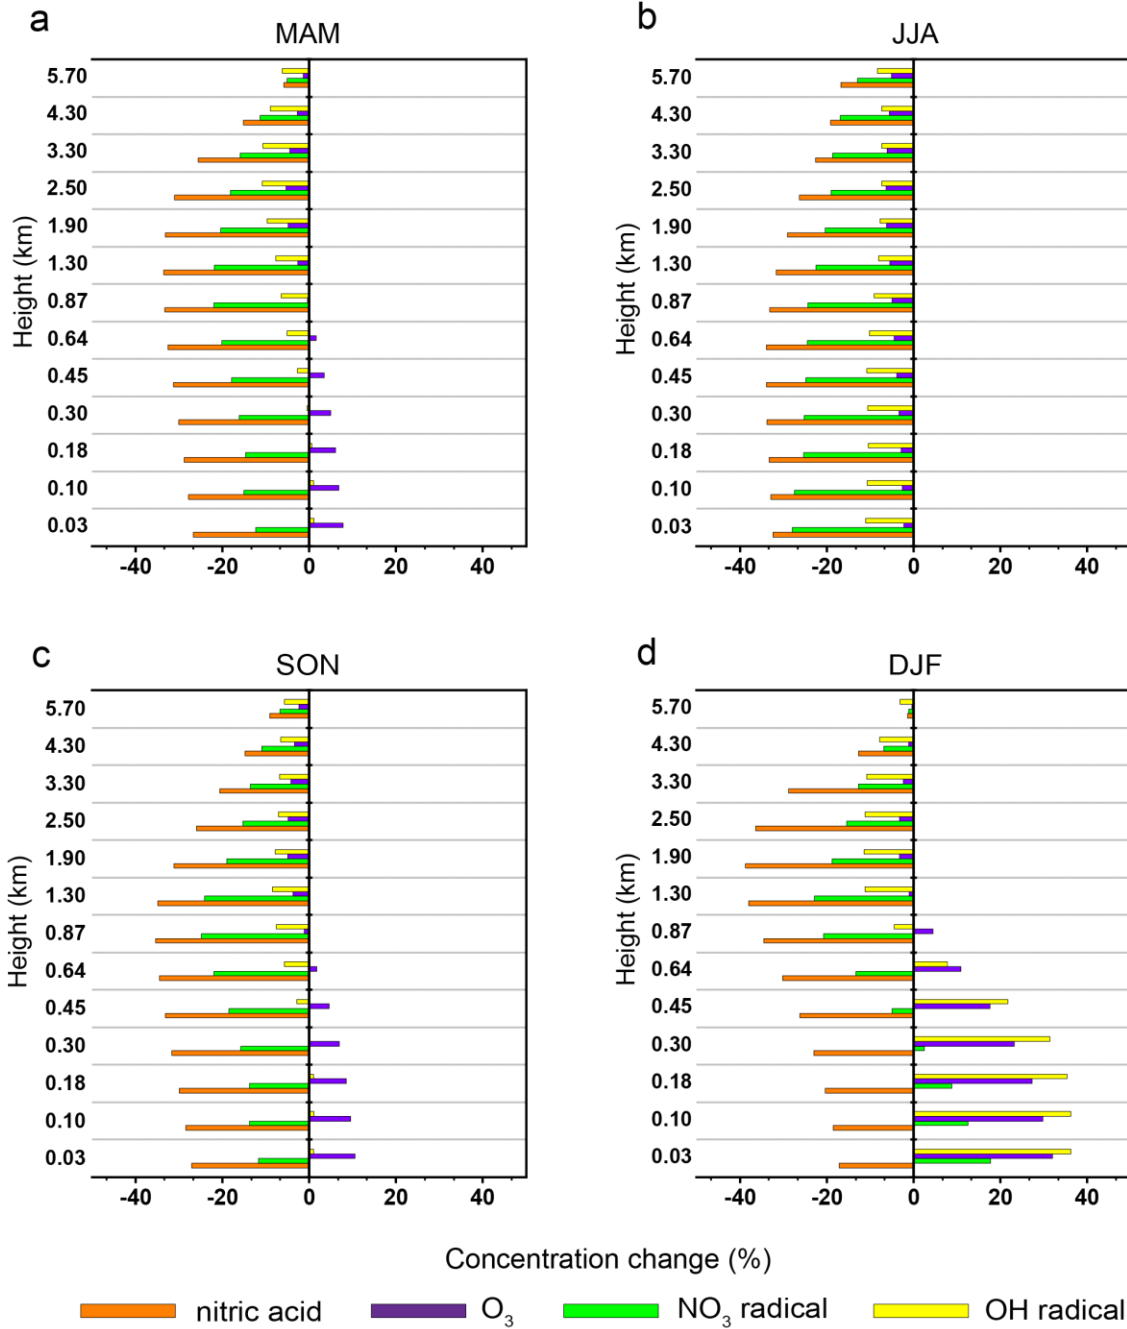

**Supplementary Fig. 11** Seasonal averaged changes (%) in vertical gradient nitric acid, O<sub>3</sub>, NO<sub>3</sub> radical and OH radical under a 30% NO<sub>x</sub> emission reduction over Southern China. Four different seasonal periods are shown, i.e., **a** MAM (March, April, and May), **b** JJA (June, July, and August), **c** SON (September, October, and November), and **d** DJF (December, January, and February).

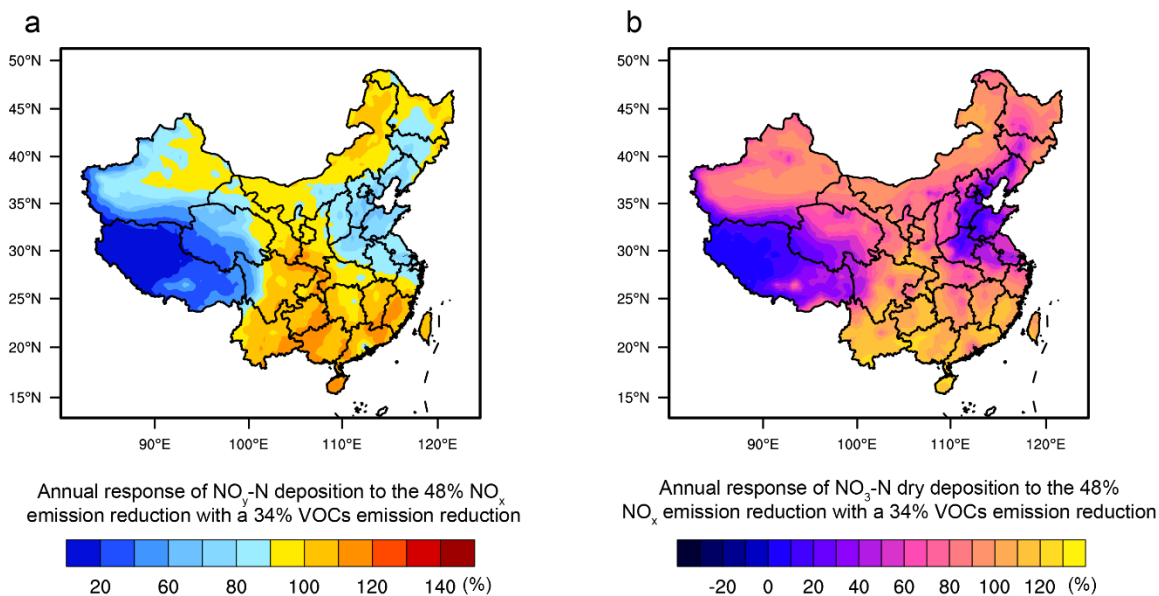

**Supplementary Fig. 12 Response of  $\text{NO}_y\text{-N}$  and  $\text{NO}_3\text{-N}$  dry deposition to reduction of  $\text{NO}_x$  emissions with a 34% reduction of VOCs in China.** **a** Response of  $\text{NO}_y\text{-N}$  deposition to the 48%  $\text{NO}_x$  emission reduction with a 34% reduction of VOCs. **b** Response of  $\text{NO}_3\text{-N}$  dry deposition in the same case. The map of China was reproduced from the National Geographic Information Resource Directory Service System (<https://github.com/huangynj/NCL-Chinamap.git> and <https://www.webmap.cn/commres.do?method=result100W>).

**Supplementary Table 1 Simulation experiments by WRF-Chem**

| Case                               | Description                                                                                                                   |
|------------------------------------|-------------------------------------------------------------------------------------------------------------------------------|
| Baseline                           | One simulation was performed using the anthropogenic emissions of all species and meteorological input data for the year 2015 |
| RED10                              | The same with the Base case but reducing anthropogenic NO <sub>x</sub> emissions by 10%                                       |
| RED30                              | The same with the Base case but reducing anthropogenic NO <sub>x</sub> emissions by 30%                                       |
| RED50                              | The same with the Base case but reducing anthropogenic NO <sub>x</sub> emissions by 50%                                       |
| RED50_VOCs                         | The same with the Base case but reducing anthropogenic NO <sub>x</sub> emissions by 48% and VOCs emissions by 34%             |
| Base_meteo                         | Five-year simulation with fixed emissions at 2015 and the meteorological conditions for the years 2011-2015                   |
| RED30_2011                         | The same with the RED30 but using the meteorological conditions for 2011                                                      |
| N <sub>2</sub> O <sub>5</sub> _off | The formation pathways of NO <sub>3</sub> radical and N <sub>2</sub> O <sub>5</sub> were turned off in the simulation         |
| EC_off                             | The anthropogenic emissions in the Eastern China were turned off.                                                             |
| SC_off                             | The anthropogenic emissions in the Southern China were turned off.                                                            |
| Other_off                          | The anthropogenic emissions in the other region were turned off.                                                              |



**Supplementary Table 2 Comparison of simulated surface concentrations of O<sub>x</sub> (O<sub>x</sub>=O<sub>3</sub>+NO<sub>2</sub>) with the observations at air quality stations during winter of 2015 across China.** The observation data were collected from the China Environmental Monitoring Center (available at: <https://www.aqistudy.cn/historydata/>).

| City Name    | Latitude | Longitude | Observation<br>( $\mu\text{g m}^{-3}$ ) | Simulation<br>( $\mu\text{g m}^{-3}$ ) |
|--------------|----------|-----------|-----------------------------------------|----------------------------------------|
| Beijing      | 40.3     | 116.8     | 106.0                                   | 90.5                                   |
| Shijiazhuang | 38.04    | 114.5     | 102.0                                   | 82.1                                   |
| Shenyang     | 41.8     | 123.43    | 98.3                                    | 90.7                                   |
| Changchun    | 43.89    | 125.32    | 109.3                                   | 91.5                                   |
| Haerbin      | 45.76    | 126.64    | 112.0                                   | 95.8                                   |
| Taiyuan      | 37.86    | 112.55    | 68.7                                    | 78.9                                   |
| Jinan        | 36.67    | 117       | 109.7                                   | 90.6                                   |
| Zhengzhou    | 34.3     | 113.65    | 110.3                                   | 86.6                                   |
| Nanyang      | 32.99    | 112.54    | 89.7                                    | 76.3                                   |
| Wuhan        | 31       | 114.31    | 111.0                                   | 86.7                                   |
| Shanghai     | 31.23    | 121.47    | 121.7                                   | 97.5                                   |
| Nanjing      | 32.07    | 118.78    | 111.3                                   | 93.4                                   |
| Hangzhou     | 30.29    | 120.15    | 109.0                                   | 105.6                                  |
| Xi'an        | 34.27    | 108.93    | 84.7                                    | 90.9                                   |
| Chengdu      | 30.67    | 104.06    | 101.3                                   | 105.8                                  |
| Chongqing    | 29.53    | 106.5     | 76.7                                    | 106.3                                  |
| Nanchang     | 28.68    | 115.89    | 83.3                                    | 91.3                                   |
| Changsha     | 28.2     | 113       | 98.7                                    | 90.5                                   |
| Hefei        | 31.86    | 117.28    | 74.0                                    | 92.8                                   |
| Guangzhou    | 23.5     | 113.5     | 113.3                                   | 96.3                                   |

**Supplementary Table 3 The simulated nitrogen deposition over China in 2015.**

|                       | <b>Deposition process</b>          | <b>Deposition (Tg N yr<sup>-1</sup>)</b> |
|-----------------------|------------------------------------|------------------------------------------|
| <b>NO<sub>y</sub></b> | Total                              | 5.20                                     |
|                       | NO <sub>3</sub> -N                 | 4.33                                     |
|                       | Gas-phase NO <sub>3</sub> -N dry   | 1.49                                     |
|                       | Particulate NO <sub>3</sub> -N dry | 0.3                                      |
|                       | NO <sub>3</sub> -N wet             | 2.54                                     |
|                       | NO <sub>x</sub>                    | 0.74                                     |
|                       | N <sub>2</sub> O <sub>5</sub>      | 0.06                                     |
|                       | PAN                                | 0.07                                     |
| <b>NH<sub>x</sub></b> | Total                              | 5.78                                     |
|                       | NH <sub>x</sub> -N dry             | 1.74                                     |
|                       | NH <sub>x</sub> -N wet             | 4.04                                     |

**Supplementary Table 4 Percent changes in annual NO<sub>y</sub> deposition by the modelled variations of meteorological conditions from 2011 to 2015.** The results were derived from the WRF-Chem simulations over China with constant emissions but year-to-year meteorological data input during 2011-2015.

| <b>Station</b> | <b>Change (%)</b> |
|----------------|-------------------|
| BJ             | -3%               |
| QZ             | 15%               |
| SZ             | -6%               |
| YQ             | 10%               |
| ZZ             | -2%               |
| ZD             | 28%               |
| CD             | 10%               |
| LS             | 24%               |
| DL             | 5%                |
| YL             | 12%               |

1 **Supplementary References**

- 2 1. Ge, B. et al. Model Inter-Comparison Study for Asia (MICS-Asia) phase III:  
3 multimodel comparison of reactive nitrogen deposition over China. *Atmos. Chem.*  
4 *Phys.* **20**, 10587-10610 (2020).  
5  
6 2. Xu, W. et al. Quantifying atmospheric nitrogen deposition through a nationwide  
7 monitoring network across China. *Atmos. Chem. Phys.* **15**, 12345-12360 (2015).  
8  
9 3. Zhao, Y. et al. Atmospheric nitrogen deposition to China: A model analysis on  
10 nitrogen budget and critical load exceedance. *Atmos. Environ.* **153**, 32-40 (2017).  
11  
12 4. Liu, M. et al. Rapid SO<sub>2</sub> emission reductions significantly increase tropospheric  
13 ammonia concentrations over the North China Plain. *Atmos. Chem. Phys.* **18**,  
14 17933-17943 (2018).  
15  
16 5. Liu, M. et al. Ammonia emission control in China would mitigate haze pollution  
17 and nitrogen deposition, but worsen acid rain. *Proceedings of the National*  
18 *Academy of Sciences* **116**, 7760 (2019).  
19  
20 6. Miao, R. et al. Model bias in simulating major chemical components of PM<sub>2.5</sub> in  
21 China. *Atmos. Chem. Phys.* **20**, 12265-12284 (2020).  
22  
23 7. Xu, W., Zhang, L., Liu, X. A database of atmospheric nitrogen concentration and  
24 deposition from the nationwide monitoring network in China. *Sci. Data* **6**, 51  
25 (2019).  
26  
27  
28
